# Supplementary material for: Microalgae as a New Source of Oxylipins: A Comprehensive LC-MS-Based Analysis Using Conventional and Green Extraction Methods
Source: PubMed Central journal article supplement (PMC11299188; doi:10.1021/acs.jafc.4c03264), 2024-07-17
Supplement: jf4c03264_si_001.pdf [file jf4c03264_si_001.pdf]

## SUPPORTING INFORMATION

### **Microalgae as a new source of oxylipins: a comprehensive LC-MS based analysis using conventional and green extraction methods**

Arturo Auñon-Lopez<sup>1,2</sup>, Jon Alberdi-Cedeño<sup>1,3</sup>, Marc Pignitter<sup>1,\*</sup>, Natalia Castejón<sup>4,\*</sup>

<sup>1</sup>Institute of Physiological Chemistry, Faculty of Chemistry, University of Vienna, 1090 Vienna, Austria

<sup>2</sup>Vienna Doctoral School in Chemistry (DoSChem), University of Vienna, Währinger Str. 42, 1090 Vienna, Austria

<sup>3</sup>Food Technology, Faculty of Pharmacy, Lascaray Research Center, University of the Basque Country (UPV-EHU), Paseo de la Universidad nº 7, 01006 Vitoria-Gasteiz, Spain

<sup>4</sup>Institute of Food Chemistry and Toxicology, Faculty of Chemistry, University of Vienna, Waehringer Str. 38, 1090 Vienna, Austria

\* Equally corresponding authors. E-mail address: [marc.pignitter@univie.ac.at](mailto:marc.pignitter@univie.ac.at) (M. Pignitter); [natalia.castejon@univie.ac.at](mailto:natalia.castejon@univie.ac.at) (N. Castejón).

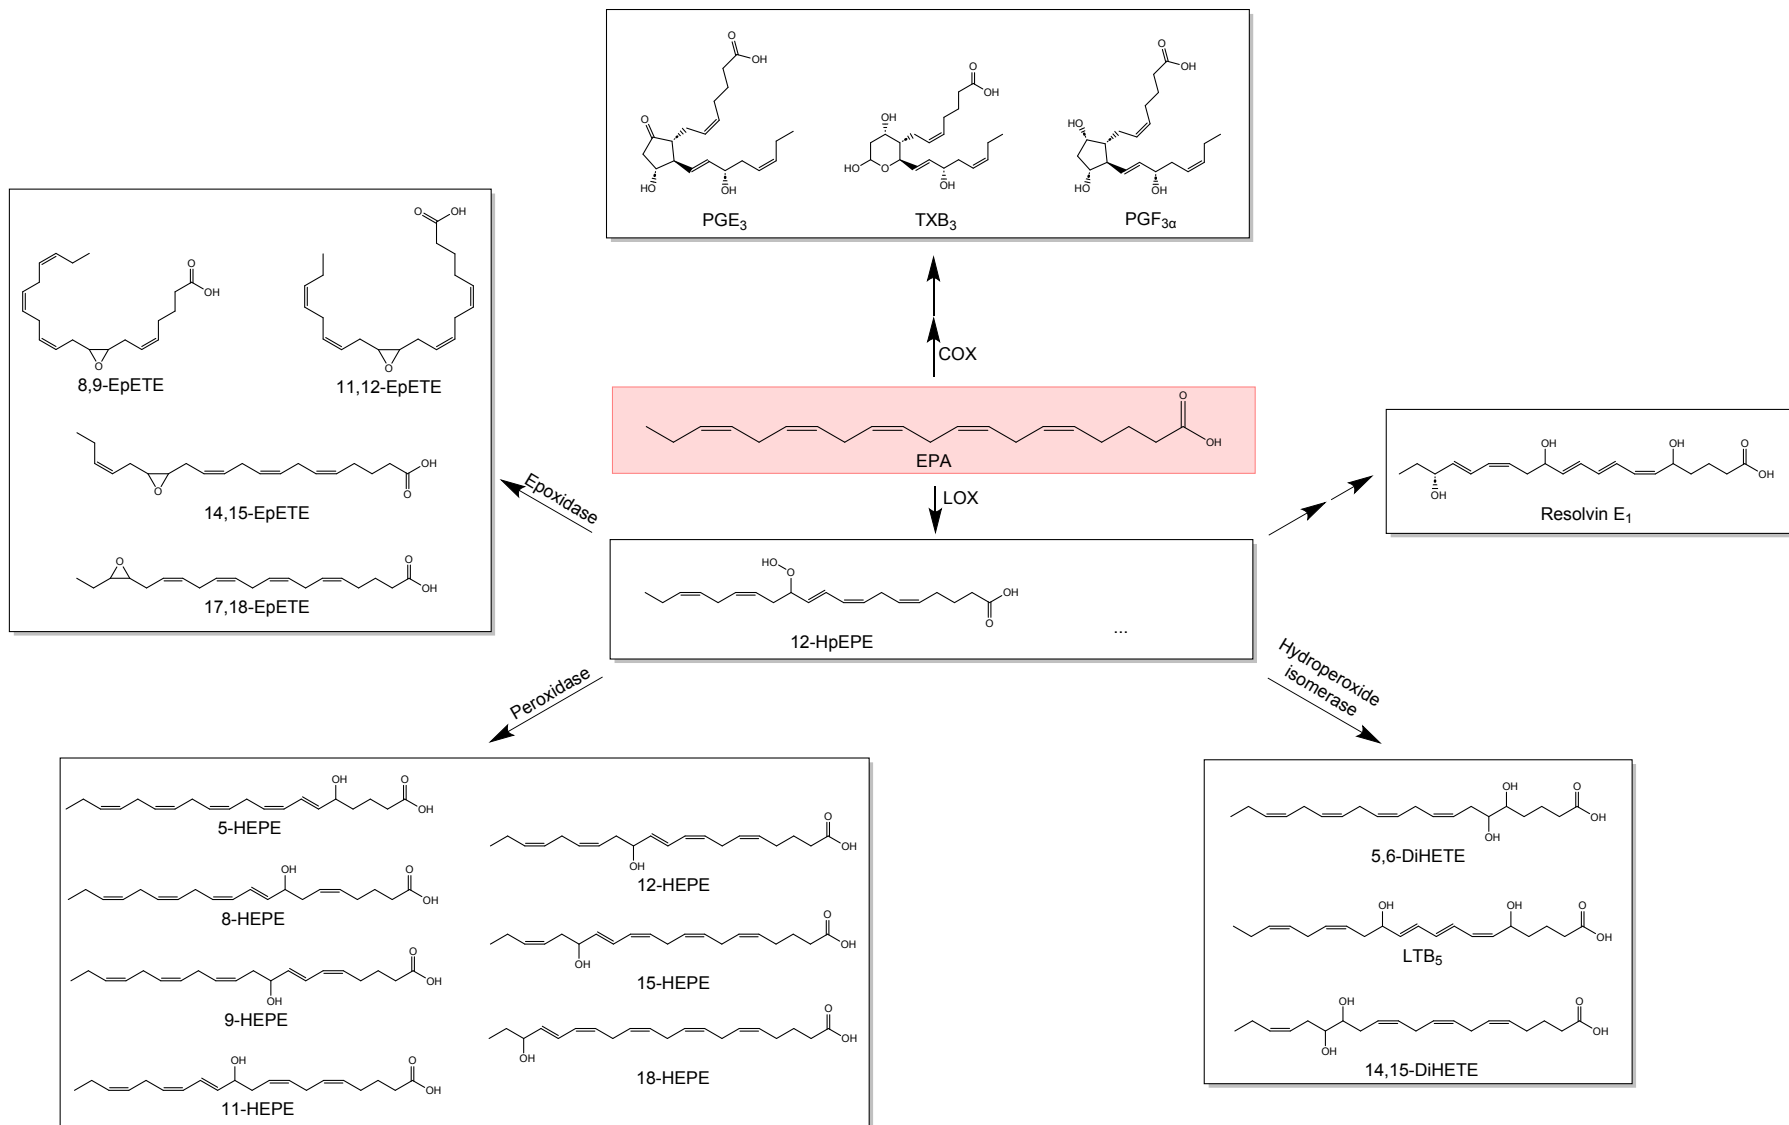

**Figure S1.** Postulated biosynthetic pathway in microalgae for the EPA-derived oxylipins determined in the present study, Andreou et al., 2009; Gabbs et al., 2015; and Jagusch et al., 2020.<sup>1-3</sup> A “...” symbol represents that the existence of other intermediates of the same class is assumed, but not detected. EPA: Eicosapentaenoic acid; HEPE: Hydroxyeicosapentaenoic acid; EpETE: Epoxyeicosatetraenoic acid; DiHETE: Dihydroxyeicosatetraenoic acid; TX: Thromboxane; PG: Prostaglandin; LT: Leukotriene; HpEPE: Hydroperoxyeicosapentaenoic acid; LOX: Lipoxygenase.

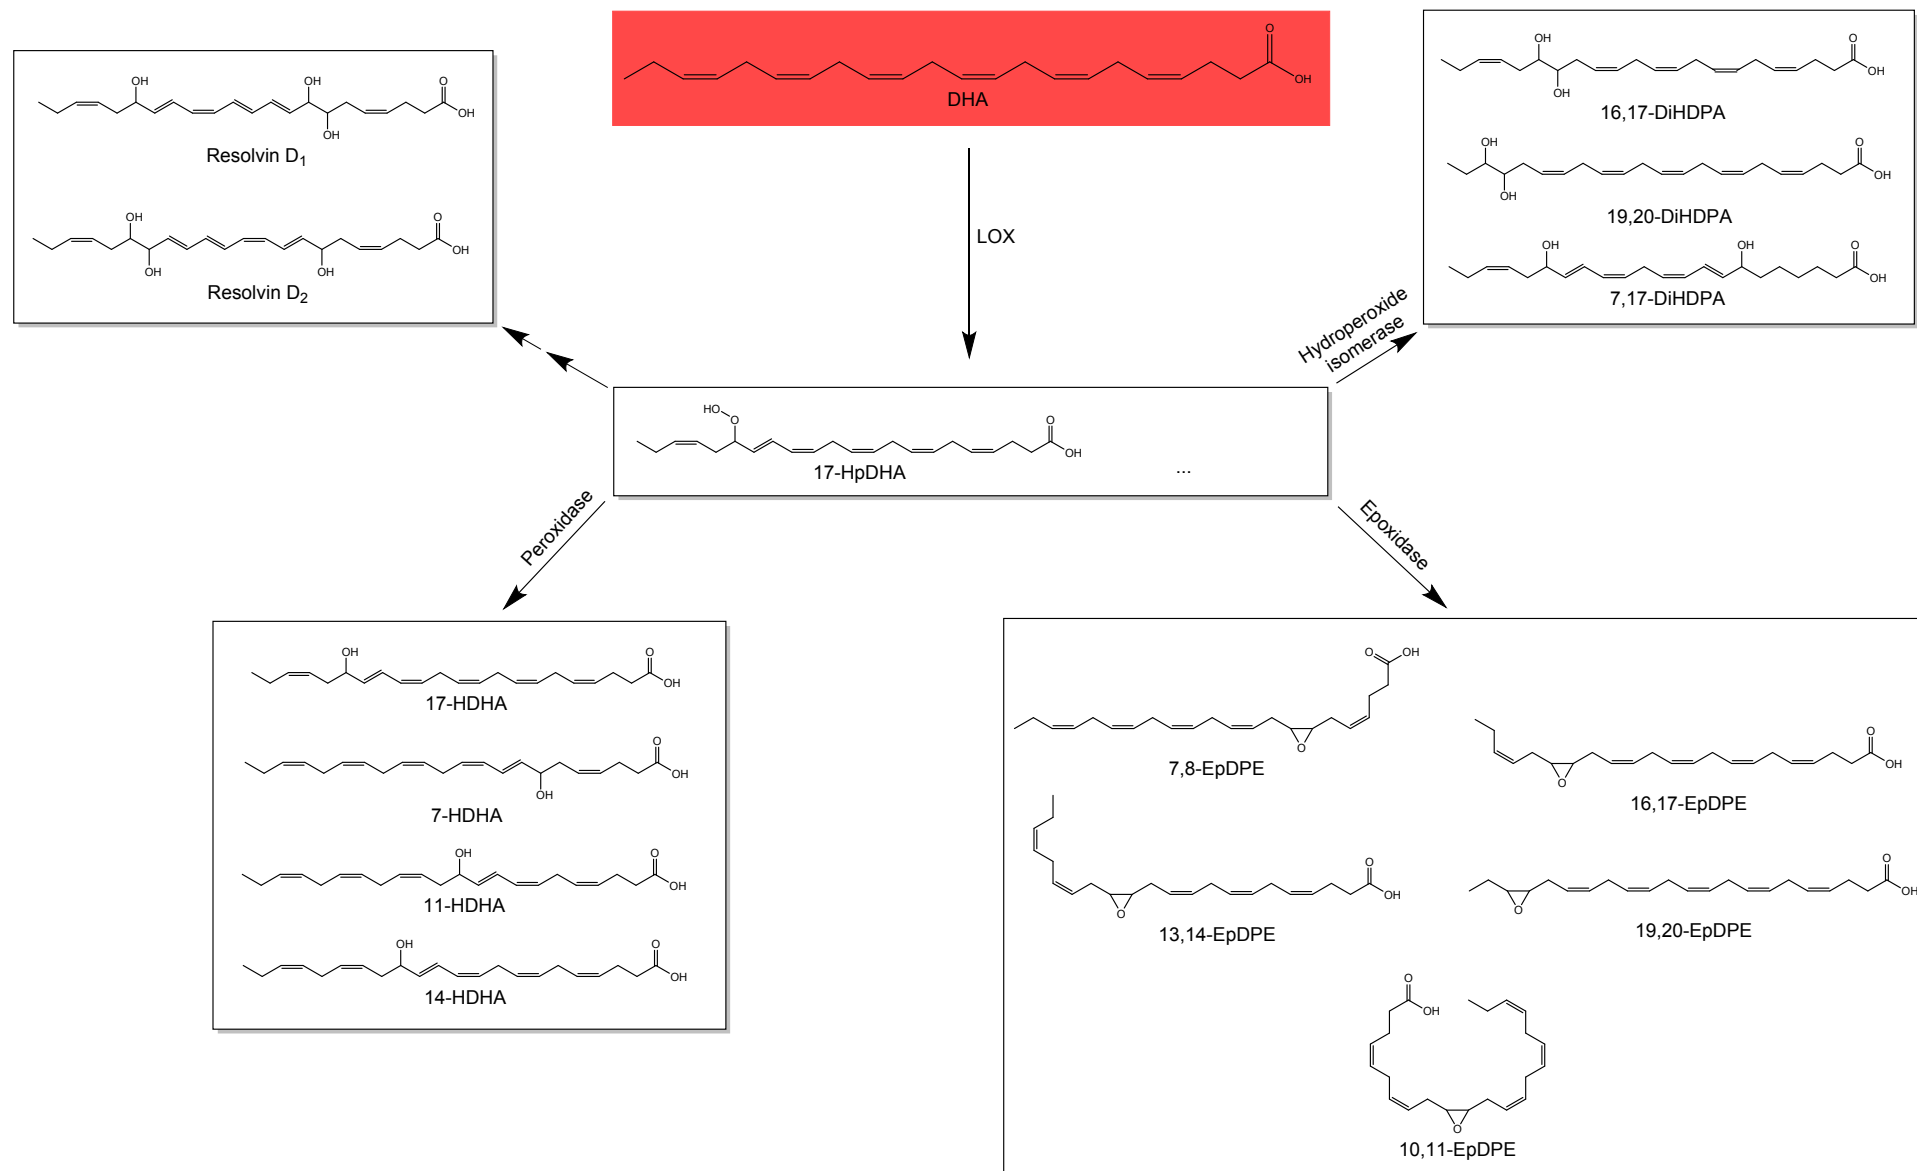

**Figure S2.** Postulated biosynthetic pathway in microalgae for the DHA-derived oxylipins determined in the present study, based on Andreou et al., 2009; Gabbs et al., 2015; and Jagusch et al., 2020.<sup>1-3</sup> A “...” symbol represents that the existence of other intermediates of the same class is assumed, but not detected. DHA: Docosahexaenoic acid; HDHA: Hydroxydocosahexaenoic acid; EpDPE: Epoxydocosapentaenoic acid; DiHDPA: Dihydroxydocosapentaenoic acid; HpDHA: Hydroperoxydocosahexaenoic acid; LOX: Lipoxygenase.

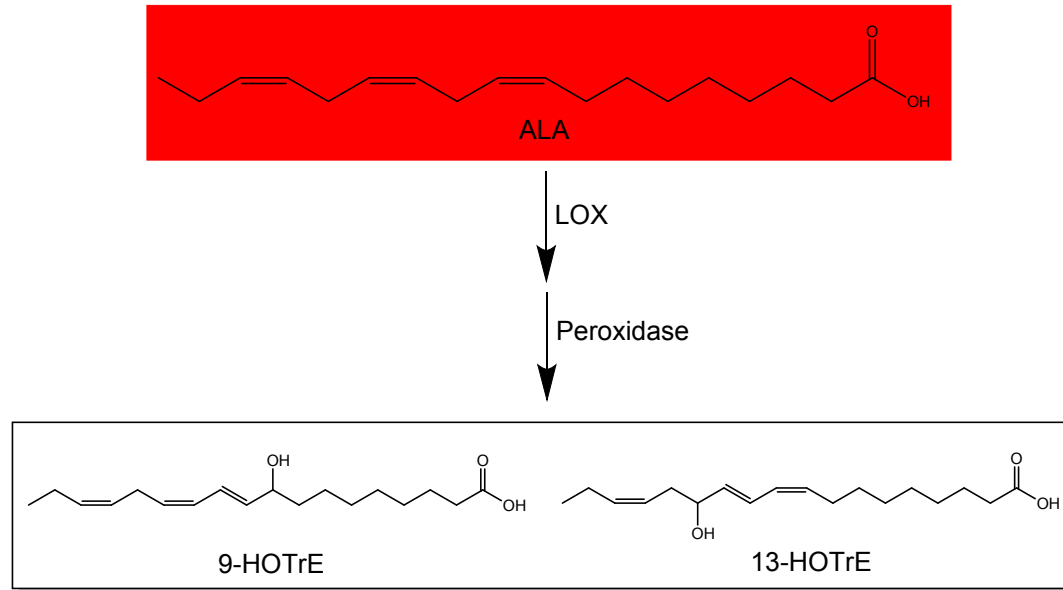

**Figure S3.** Postulated biosynthetic pathway in microalgae for the ALA-derived oxylipins determined in the present study, based on Andreou et al., 2009; Gabbs et al., 2015; and Jagusch et al., 2020.<sup>1-3</sup> ALA: Linolenic acid; HOTrE: Hydroxyoctadecatrienoic acid; LOX: Lipoxygenase.

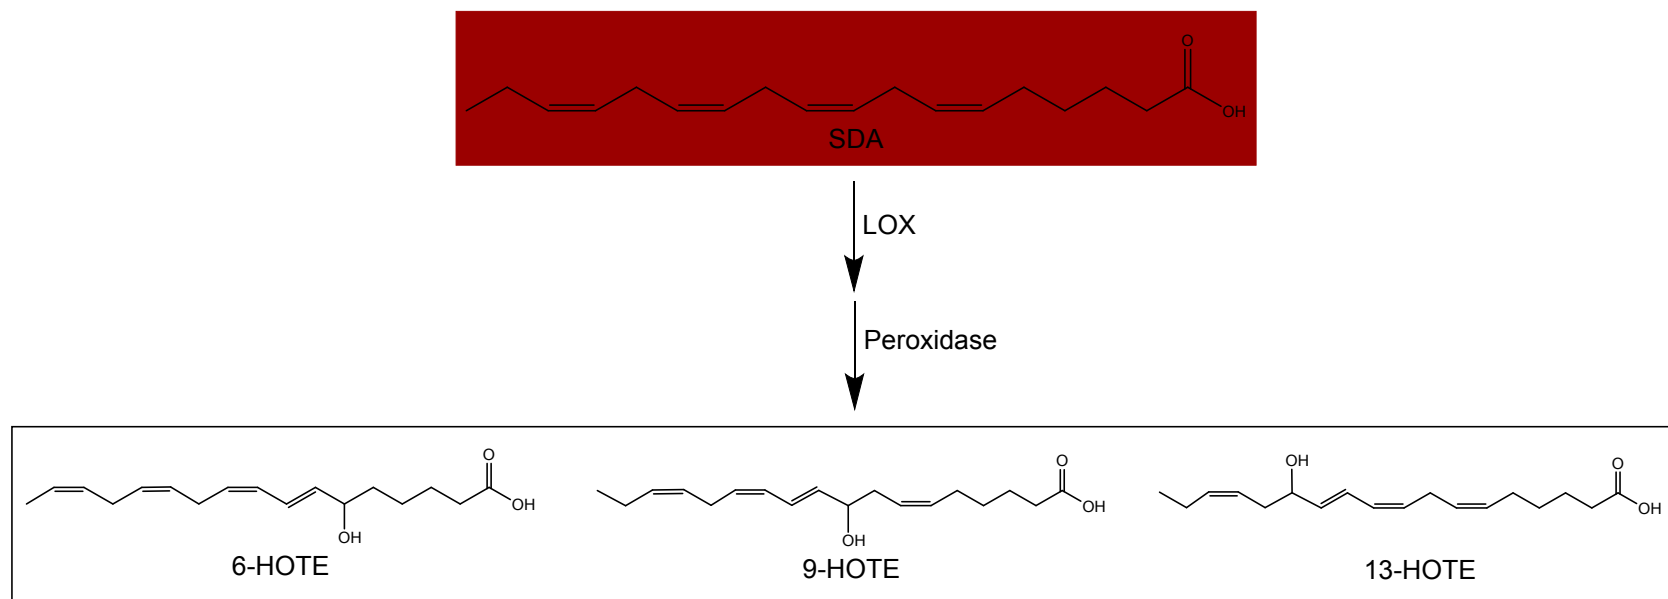

**Figure S4.** Postulated biosynthetic pathway in microalgae for the SDA-derived oxylipins determined in the present study, Andreou et al., 2009; Gabbs et al., 2015; and Jagusch et al., 2020.<sup>1-3</sup> SDA: Stearidonic acid; HOTE: hydroxyoctadecatetraenoic acid; LOX: Lipoxygenase.

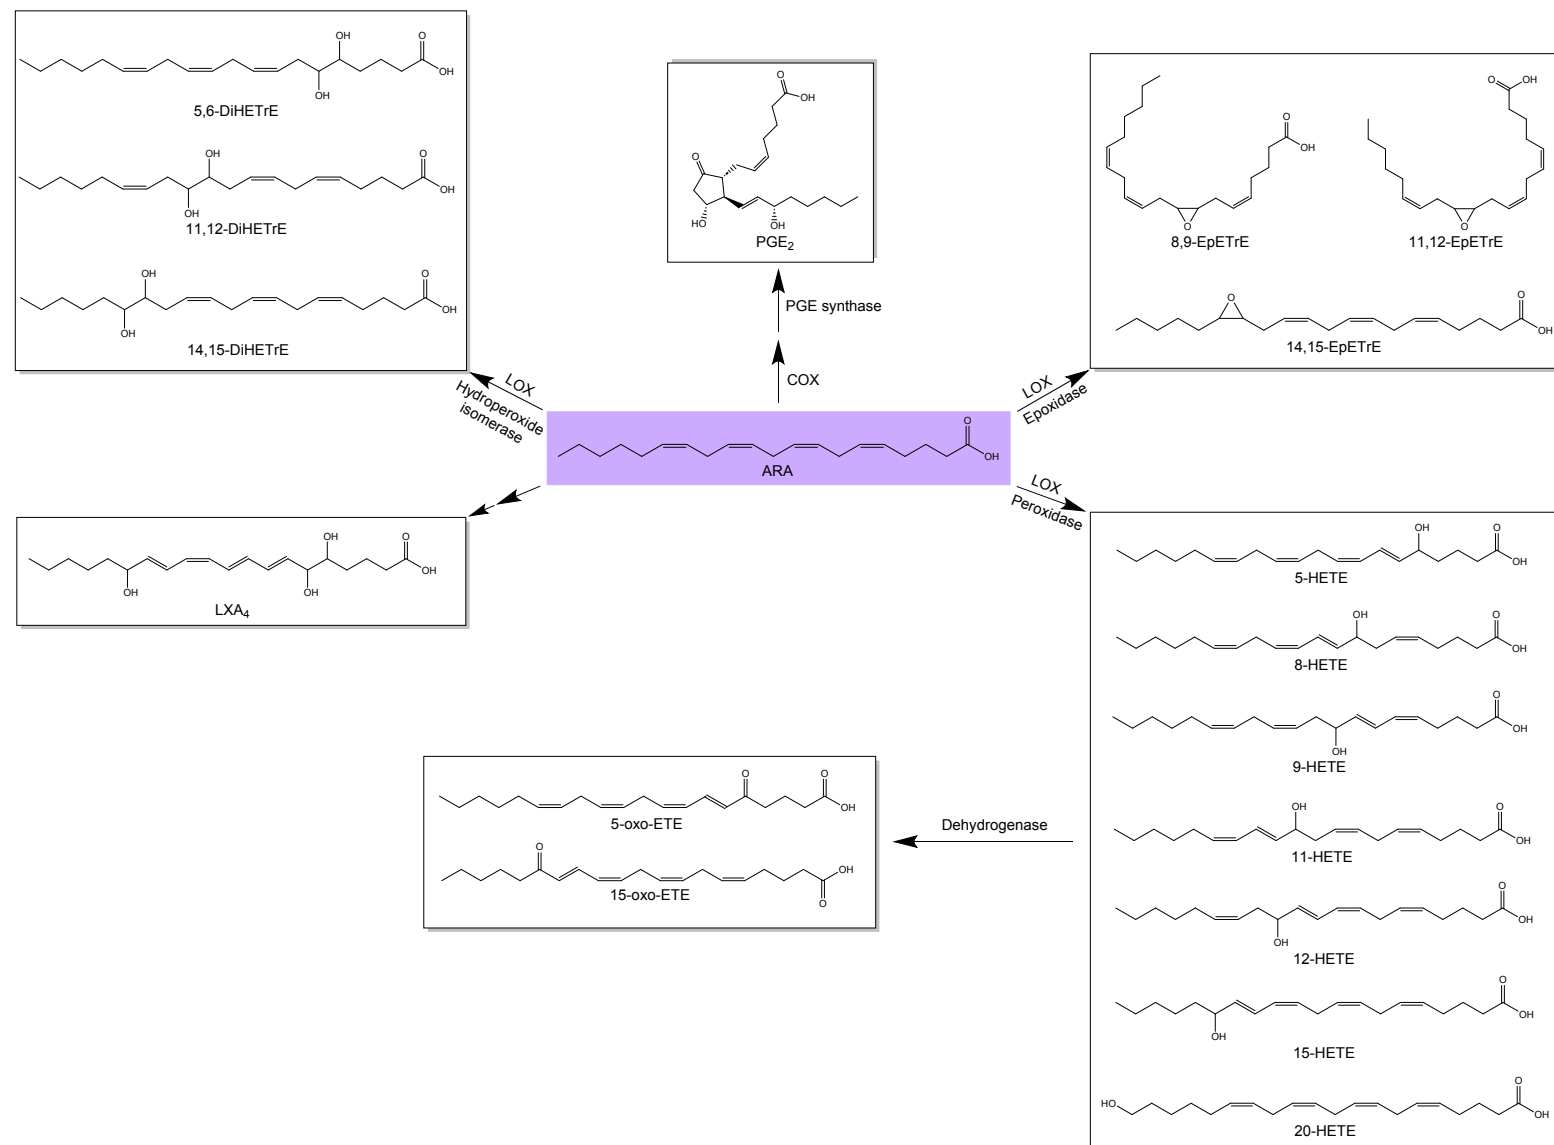

**Figure S5.** Postulated biosynthetic pathway in microalgae for the ARA-derived oxylipins determined in the present study, Andreou et al., 2009; Gabbs et al., 2015; and Jagusch et al., 2020.<sup>1-3</sup> ARA: Arachidonic acid; HETE: Hydroxyeicosatetraenoic acid; Oxo-ETE: oxoeicosatetraenoic acid; EpETrE: Epoxyeicosatrienoic acid; DiHETrE: Dihydroxyeicosatrienoic acid; LX: Lipoxin; PG: Prostaglandin; LOX: Lipoxygenase; COX: Cyclooxygenase.

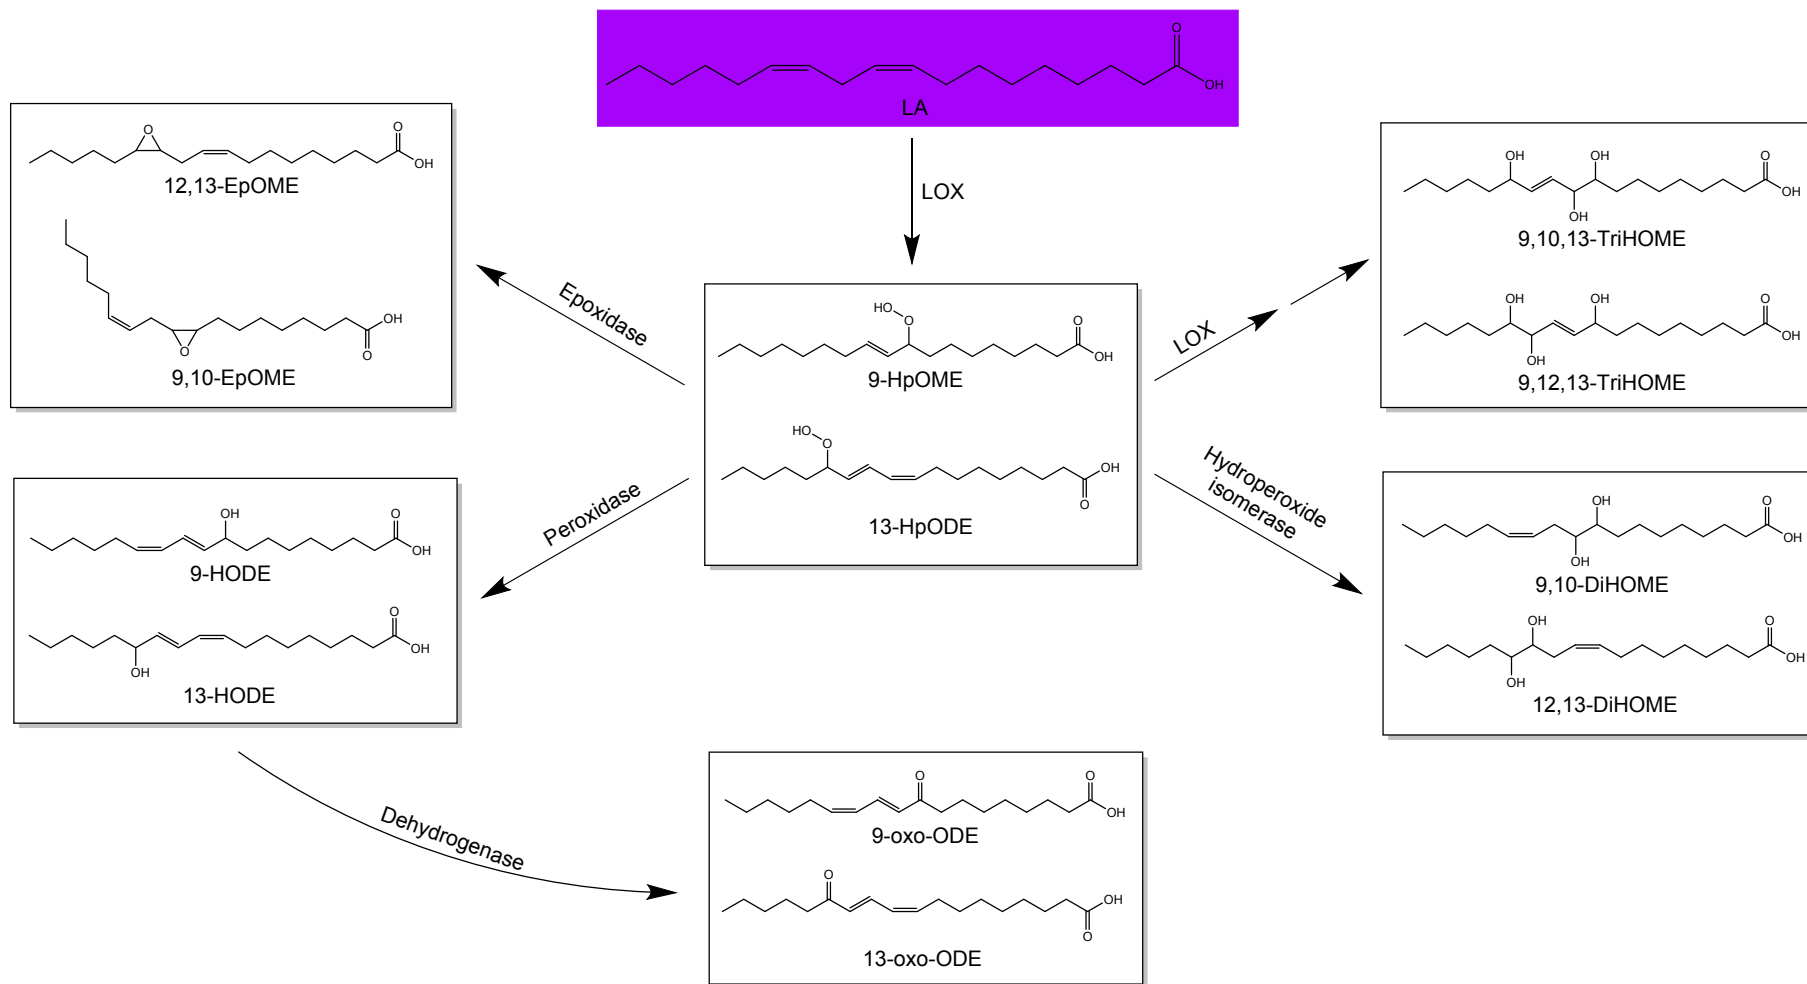

**Figure S6.** Postulated biosynthetic pathway in microalgae for the LA-derived oxylipins determined in the present study, Andreou et al., 2009; Gabbs et al., 2015; and Jagusch et al., 2020.<sup>1-3</sup> LA: Linoleic acid; EpOME: Epoxyoctadecenoic acid; HOME: Hydroxyoctadecenoic acid; HODE: Hydroxyoctadecadienoic acid; Oxo-ODE: Oxo-octadecadienoic acid; HpOME: Hydroperoxyoctadecenoic acid, HpODE: Hydroperoxyoctadecadienoic acid; LOX: Lipoxygenase.

**Table S1.** Free oxylipins analyzed by LC-MS/MS based on previous studies.<sup>4,5</sup>

| precursor fatty acid | free oxylipin                       | retention time (min) | precursor ion (m/z) | product ion (m/z)* | collision energy (V) |
|----------------------|-------------------------------------|----------------------|---------------------|--------------------|----------------------|
| EPA                  | 5-HEPE                              | 23.5                 | 317.2               | 115.1              | 4                    |
|                      | 8-HEPE                              | 22.5                 | 317.2               | 155.2              | 7                    |
|                      | 12-HEPE                             | 22.9                 | 317.2               | 208.0/179.2        | 4                    |
|                      | 15-HEPE                             | 22.0                 | 317.2               | 247.0/219.2        | 4                    |
|                      | 8;9-EpETE                           | 22.1                 | 317.2               | 127.2              | 4                    |
|                      | 11;12-EpETE                         | 21.9                 | 317.2               | 167.2              | 4                    |
|                      | 14;15-EpETE                         | 21.8                 | 317.2               | 207.2              | 4                    |
|                      | 17;18-EpETE                         | 20.7                 | 317.2               | 259.2/215.2        | 10/4                 |
|                      | 11-HEPE                             | 22.3                 | 317.2               | 195.0              | 10                   |
|                      | 9-HEPE                              | 23.1                 | 317.2               | 149.1/123.1        | 10                   |
|                      | 5,6-DiHETE                          | 18.4                 | 335.2               | 145.0/115.2        | 4                    |
|                      | 14,15-DiHETE                        | 20.0                 | 335.2               | 207.2              | 7                    |
|                      | TXB <sub>3</sub>                    | 2.0                  | 367.2               | 169.1              | 4                    |
|                      | PGF <sub>3<math>\alpha</math></sub> | 2.0                  | 351.2               | 193.2              | 4                    |
|                      | PGE <sub>3</sub>                    | 2.0                  | 349.2               | 269.2              | 10                   |
|                      | Resolvin E <sub>1</sub>             | 2.1                  | 349.2               | 195                | 10                   |
|                      | LTB <sub>5</sub>                    | 12.7                 | 333.2               | 195.1              | 4                    |
|                      | 18-HEPE                             | 21.0                 | 317.2               | 259.2              | 10                   |
|                      | 12/15-HpEPE                         | 29.4                 | 333.0               | 271.0              | 4                    |
|                      | DHA                                 | 17-HDHA              | 25.1                | 343.2              | 281.2/245.0          |
| 7;8-EpDPE            |                                     | 26.1                 | 343.2               | 141.0/113.1        | 4                    |
| 10;11-EpDPE          |                                     | 25.5                 | 343.2               | 153.2              | 4                    |
| 13;14-EpDPE          |                                     | 25.3                 | 343.2               | 193.2              | 4                    |
| 16;17-EpDPE          |                                     | 24.9                 | 343.2               | 233.2              | 4                    |
| 19;20-EpDPE          |                                     | 24.0                 | 343.2               | 241.2              | 7                    |
| 16,17-DiHDPA         |                                     | 18.1                 | 343.3               | 233.1              | 8                    |
| 19,20-DiHDPA         |                                     | 27.8                 | 361.5               | 273.1              | 4                    |
| 7-HDHA               |                                     | 25.0                 | 361.5               | 201.2              | 4                    |



|     |                         |      |       |             |      |
|-----|-------------------------|------|-------|-------------|------|
| DHA | Resolvin D <sub>1</sub> | 2.2  | 343.3 | 141.0/121.0 | 10   |
|     | Resolvin D <sub>2</sub> | 2.0  | 375.2 | 233.0/175.0 | 20   |
|     | 11-HDHA                 | 25.8 | 359.2 | 149.0       | 4    |
|     | 14-HDHA                 | 25.6 | 343.3 | 205.0       | 4    |
|     | 17-HpDHA                | 26.6 | 359.0 | 297.0       | 4    |
|     | 7,17-DiHDPA             | 11.2 | 361.2 | 263.0       | 4    |
| ALA | 9-HOTrE                 | 20.1 | 293.2 | 171.2       | 4    |
|     | 13-HOTrE                | 20.9 | 293.2 | 195.1       | 10   |
| SDA | 6-HOTE                  | 18.9 | 291.2 | 129.1       | 4    |
|     | 9-HOTE                  | 16.7 | 291.2 | 171.2       | 4    |
|     | 13-HOTE                 | 16.6 | 291.2 | 195.2       | 10   |
| ARA | 5-HETE                  | 26.5 | 319.2 | 115.1       | 10   |
|     | 8-HETE                  | 25.9 | 319.2 | 155.2       | 7    |
|     | 9-HETE/11-HETE          | 25.4 | 319.2 | 167.2       | 7    |
|     | 12-HETE                 | 26.0 | 319.2 | 179.2       | 7    |
|     | 15-HETE                 | 24.6 | 319.2 | 219.2       | 4    |
|     | 20-HETE                 | 25.0 | 319.2 | 275.1       | 10   |
|     | 5-oxo-EETE              | 28.1 | 317.2 | 273.2/203.0 | 7/17 |
|     | 15-oxo-EETE             | 25.7 | 317.2 | 113.1       | 10   |
|     | 5;6-EpETrE              | 26.3 | 319.2 | 191.1       | 4    |
|     | 8;9-EpETrE/11;12-EpETrE | 25.1 | 319.2 | 167.2       | 4    |
|     | 14;15-EpETrE            | 24.3 | 319.2 | 219.3       | 4    |
|     | 5,6-DiHETrE             | 21.7 | 337.2 | 145.1       | 7    |
|     | 11,12-DiHETrE           | 18.6 | 337.2 | 167.1       | 13   |
|     | 14,15-DiHETrE           | 18.6 | 337.2 | 207.1       | 10   |
|     | LXA <sub>4</sub>        | 11   | 351.2 | 115.2       | 10   |
|     | PGE <sub>2</sub>        | 2.2  | 351.2 | 271.3       | 16   |
| LA  | 12;13-EpOME             | 23.9 | 295.3 | 195.2       | 7    |
|     | 9;10-EpOME              | 24   | 295.3 | 171.1       | 7    |
|     | 9,10-DiHOME             | 17.5 | 313.2 | 201.2       | 16   |

|    |                 |      |       |       |    |
|----|-----------------|------|-------|-------|----|
| LA | 12,13-DiHOME    | 16.6 | 313.2 | 183.2 | 16 |
|    | 9-HODE          | 24   | 295.2 | 171.1 | 10 |
|    | 13-HODE         | 25.2 | 295.2 | 195.2 | 13 |
|    | 9-oxo-ODE       | 25.8 | 293.2 | 185.1 | 13 |
|    | 13-oxo-ODE      | 24.5 | 293.2 | 195.1 | 13 |
|    | 9,10,13-TriHOME | 20.4 | 329.2 | 171.1 | 16 |
|    | 9,12,13-TriHOME | 20.8 | 329.2 | 211.1 | 16 |
|    | Total HpOME     | 25   | 311.1 | 293.2 | 10 |
|    | 13-HpODE        | 25   | 311.1 | 113.1 | 20 |
|    | 9-HpOME         | 25   | 311.1 | 123.0 | 20 |

EPA: Eicosapentaenoic acid; DHA: Docosahexaenoic acid; ALA: Linolenic acid; SDA: Stearidonic acid; ARA: Arachidonic acid; LA: Linoleic acid; HEPE: Hydroxyeicosapentaenoic acid; EpETE: Epoxyeicosatetraenoic acid; DiHETE: Dihydroxyeicosatetraenoic acid; TX: Thromboxane; PG: Prostaglandin; LT: Leukotriene; HpEPE: Hydroperoxyeicosapentaenoic acid; HDHA: Hydroxydocosahexaenoic acid; EpDPE: Epoxydocosapentanoic acid; DiHDPA: Dihydroxydocosapentaenoic acid; HpDHA: Hydroperoxydocosahexaenoic acid; HOTrE: Hydroxy octadecatrienoic acid; HOTE: hydroxyoctadecatetraenoic acid; HETE: Hydroxyeicosatetraenoic acid; Oxo-ETE: oxoeicosatetraenoic acid; EpETrE: Epoxyeicosatrienoic acid; DiHETrE: Dihydroxyeicosatrienoic acid; LX: Lipoxin; PG: Prostaglandin; EpOME: Epoxyoctadecenoic acid; HOME: Hydroxyoctadecenoic acid; HODE: Hydroxyoctadecadienoic acid; Oxo-ODE: Oxooctadecadienoic acid; HpOME: Hydroperoxyoctadecenoic acid; HpODE: Hydroperoxyoctadecadienoic acid.

**Table S2.** Omega-3 derived oxylipins from *Microchloropsis gaditana*, *Tisochrysis lutea*, *Phaeodactylum tricornutum* and *Porphyridium cruentum* after Folch extraction.

| precursor fatty acid | free oxylipin           | concentration (µg/g)      |                            |                             |                            |
|----------------------|-------------------------|---------------------------|----------------------------|-----------------------------|----------------------------|
|                      |                         | <i>M. gaditana</i>        | <i>T. lutea</i>            | <i>P. tricornutum</i>       | <i>P. cruentum</i>         |
| EPA                  | 5-HEPE                  | 156.7 ± 91.8 <sup>a</sup> | 6.5 ± 5.7 <sup>b</sup>     | 81.0 ± 24.6 <sup>ab</sup>   | 34.0 ± 6.1 <sup>b</sup>    |
|                      | 8-HEPE                  | 18.1 ± 10.5 <sup>c</sup>  | 27.8 ± 21.5 <sup>c</sup>   | 304.2 ± 85.6 <sup>a</sup>   | 158.8 ± 16.0 <sup>b</sup>  |
|                      | 12-HEPE                 | 5.7 ± 5.1 <sup>c</sup>    | 13.5 ± 9.8 <sup>c</sup>    | 136.8 ± 38.4 <sup>a</sup>   | 72.1 ± 6.1 <sup>b</sup>    |
|                      | 15-HEPE                 | 14.0 ± 7.7 <sup>c</sup>   | 21.9 ± 18.3 <sup>c</sup>   | 216.3 ± 58.0 <sup>a</sup>   | 128.9 ± 12.4 <sup>b</sup>  |
|                      | 8;9-EpETE               | < LOD                     | 0.4 ± 0.3 <sup>c</sup>     | 3.2 ± 0.8 <sup>a</sup>      | 1.6 ± 0.0 <sup>b</sup>     |
|                      | 11;12-EpETE             | 5.7 ± 3.8 <sup>c</sup>    | 9.5 ± 7.3 <sup>c</sup>     | 93.0 ± 24.2 <sup>a</sup>    | 52.1 ± 5.8 <sup>b</sup>    |
|                      | 14;15-EpETE             | 16.2 ± 8.1 <sup>c</sup>   | 28.5 ± 25.2 <sup>c</sup>   | 313.5 ± 91.2 <sup>a</sup>   | 182.3 ± 22.0 <sup>b</sup>  |
|                      | 17;18-EpETE             | 42.1 ± 21.6 <sup>c</sup>  | 65.6 ± 53.0 <sup>c</sup>   | 871.8 ± 257.5 <sup>a</sup>  | 404.0 ± 77.3 <sup>b</sup>  |
|                      | 11-HEPE                 | 23.5 ± 13.8 <sup>c</sup>  | 35.7 ± 28.6 <sup>c</sup>   | 375.4 ± 117.1 <sup>a</sup>  | 206.6 ± 23.1 <sup>b</sup>  |
|                      | 9-HEPE                  | 48.9 ± 30.0 <sup>bc</sup> | 30.5 ± 23.9 <sup>c</sup>   | 273.0 ± 84.1 <sup>a</sup>   | 145.2 ± 30.5 <sup>b</sup>  |
|                      | 5,6-DiHETE              | < LOQ                     | < LOD                      | 7.8 ± 2.2 <sup>a</sup>      | 2.1 ± 0.1 <sup>b</sup>     |
|                      | 14,15-DiHETE            | < LOD                     | < LOD                      | 1.3 ± 0.4 <sup>b</sup>      | 18.2 ± 8.2 <sup>a</sup>    |
|                      | TXB <sub>3</sub>        | 0.7 ± 0.3 <sup>b</sup>    | 1.5 ± 0.7 <sup>ab</sup>    | 0.7 ± 0.5 <sup>b</sup>      | 2.1 ± 0.2 <sup>a</sup>     |
|                      | PGF <sub>3α</sub>       | 0.1 ± 0.1 <sup>b</sup>    | 0.3 ± 0.2 <sup>b</sup>     | 0.4 ± 0.2 <sup>b</sup>      | 1.7 ± 0.7 <sup>a</sup>     |
|                      | PGE <sub>3</sub>        | 1.9 ± 1.0 <sup>b</sup>    | 3.8 ± 4.4 <sup>b</sup>     | 15.1 ± 7.8 <sup>b</sup>     | 43.0 ± 27.6 <sup>a</sup>   |
|                      | Resolvin E <sub>1</sub> | 1.3 ± 0.7 <sup>c</sup>    | 1.8 ± 1.0 <sup>bc</sup>    | 4.7 ± 2.1 <sup>a</sup>      | 4.1 ± 1.3 <sup>ab</sup>    |
|                      | LTB <sub>5</sub>        | 14.0 ± 8.5 <sup>b</sup>   | 4.8 ± 3.6 <sup>b</sup>     | 44.7 ± 13.5 <sup>a</sup>    | 41.2 ± 4.5 <sup>a</sup>    |
|                      | 18-HEPE                 | 66.0 ± 33.9 <sup>c</sup>  | 102.8 ± 82.9 <sup>c</sup>  | 1367.2 ± 403.9 <sup>a</sup> | 633.5 ± 121.3 <sup>b</sup> |
|                      | 12/15-HpEPE             | 6.8 ± 4.8 <sup>a</sup>    | 0.3 ± 0.3 <sup>b</sup>     | 0.1 ± 0.1 <sup>b</sup>      | 0.9 ± 1.1 <sup>ab</sup>    |
|                      | DHA                     | 17-HDHA                   | < LOD                      | 90.0 ± 78.5 <sup>a</sup>    | 10.6 ± 4.2 <sup>a</sup>    |
| 7;8-EpDPE            |                         | < LOD                     | 20.1 ± 18.2 <sup>a</sup>   | 1.7 ± 0.7 <sup>a</sup>      | < LOD                      |
| 10;11-EpDPE          |                         | < LOD                     | 30.5 ± 27.6 <sup>a</sup>   | 2.9 ± 1.6 <sup>a</sup>      | < LOD                      |
| 13;14-EpDPE          |                         | < LOD                     | 73.5 ± 65.1 <sup>a</sup>   | 9.1 ± 4.2 <sup>a</sup>      | < LOD                      |
| 16;17-EpDPE          |                         | < LOD                     | 143.5 ± 125.5 <sup>a</sup> | 13.6 ± 5.1 <sup>a</sup>     | < LOD                      |
| 19;20-EpDPE          |                         | < LOD                     | 204.4 ± 175.5 <sup>a</sup> | 16.7 ± 6.2 <sup>a</sup>     | < LOD                      |
| 16,17-DiHDPA         |                         | < LOD                     | < LOD                      | < LOD                       | < LOD                      |
| 19,20-DiHDPA         |                         | < LOD                     | 0.5 ± 0.6 <sup>a</sup>     | < LOD                       | < LOD                      |

|     |                         |                        |                            |                        |       |
|-----|-------------------------|------------------------|----------------------------|------------------------|-------|
|     | 7-HDHA                  | < LOD                  | 41.6 ± 37.6 <sup>a</sup>   | 4.7 ± 1.8 <sup>a</sup> | < LOD |
| DHA | Resolvin D <sub>1</sub> | < LOD                  | 7.7 ± 4.8 <sup>a</sup>     | 0.8 ± 0.5 <sup>b</sup> | < LOD |
|     | Resolvin D <sub>2</sub> | < LOD                  | 25.5 ± 18.7 <sup>a</sup>   | 2.2 ± 1.1 <sup>b</sup> | < LOD |
|     | 11-HDHA                 | < LOD                  | 31.0 ± 28.4 <sup>a</sup>   | 3.3 ± 1.5 <sup>a</sup> | < LOD |
|     | 14-HDHA                 | < LOD                  | 37.4 ± 34.2 <sup>a</sup>   | 4.3 ± 2.6 <sup>a</sup> | < LOD |
|     | 17-HpDHA                | < LOD                  | 6.2 ± 5.8 <sup>a</sup>     | 2.0 ± 0.8 <sup>a</sup> | < LOD |
|     | 7,17-DiHDPA             | < LOD                  | < LOD                      | 6.3 ± 2.6 <sup>a</sup> | < LOD |
| ALA | 9-HOTrE                 | 2.4 ± 3.4 <sup>a</sup> | 52.8 ± 44.4 <sup>a</sup>   | 4.1 ± 1.0 <sup>a</sup> | < LOD |
|     | 13-HOTrE                | 4.7 ± 5.9 <sup>a</sup> | 148.1 ± 122.0 <sup>a</sup> | 8.0 ± 1.7 <sup>a</sup> | < LOD |
| SDA | 6-HOTE                  | < LOD                  | 131.3 ± 109.7 <sup>a</sup> | 6.5 ± 1.5 <sup>a</sup> | < LOD |
|     | 9-HOTE                  | < LOD                  | 4.9 ± 2.6 <sup>a</sup>     | < LOD                  | < LOD |
|     | 13-HOTE                 | < LOD                  | 102.5 ± 84.7 <sup>a</sup>  | 3.2 ± 1.0 <sup>a</sup> | < LOD |

Data is shown as mean ± SD (n ≥ 3). Different lower-case letters (a, b, c) show statistically significant differences (p < 0.05). EPA: Eicosapentaenoic acid; DHA: Docosahexaenoic acid; ALA: Linolenic acid; SDA: Stearidonic acid; HEPE: Hydroxyeicosapentaenoic acid; EpETE: Epoxyeicosatetraenoic acid; DiHETE: Dihydroxyeicosatetraenoic acid; TX: Thromboxane; PG: Prostaglandin; LT: Leukotriene; HpEPE: Hydroperoxyeicosapentaenoic acid; HDHA: Hydroxydocosahexaenoic acid; EpDPE: Epoxydocosapentaenoic acid; DiHDPA: Dihydroxydocosapentaenoic acid; HpDHA: Hydroperoxydocosahexaenoic acid; HOTrE: Hydroxy octadecatrienoic acid; HOTE: hydroxyoctadecatetraenoic acid; LOD: Limit of detection; LOQ: Limit of quantification.

**Table S3.** Omega-6 derived oxylipins from *Microchloropsis gaditana*, *Tisochrysis lutea*, *Phaeodactylum tricornutum* and *Porphyridium cruentum* after Folch extraction.

| precursor fatty acid | free oxylipin           | concentration (µg/g)      |                             |                            |                            |
|----------------------|-------------------------|---------------------------|-----------------------------|----------------------------|----------------------------|
|                      |                         | <i>M. gaditana</i>        | <i>T. lutea</i>             | <i>P. tricornutum</i>      | <i>P. cruentum</i>         |
| ARA                  | 5-HETE                  | 105.8 ± 60.3 <sup>b</sup> | 15.9 ± 28.8 <sup>c</sup>    | 24.9 ± 10.2 <sup>c</sup>   | 217.6 ± 35.3 <sup>a</sup>  |
|                      | 8-HETE                  | 2.9 ± 1.6 <sup>b</sup>    | 11.8 ± 22.2 <sup>b</sup>    | 20.8 ± 9.5 <sup>b</sup>    | 133.0 ± 28.9 <sup>a</sup>  |
|                      | 9-HETE/11-HETE          | 3.2 ± 1.2 <sup>b</sup>    | 15.8 ± 29.9 <sup>b</sup>    | 22.4 ± 9.9 <sup>b</sup>    | 199.6 ± 37.8 <sup>a</sup>  |
|                      | 12-HETE                 | 10.0 ± 5.6 <sup>b</sup>   | 44.8 ± 83.9 <sup>b</sup>    | 82.1 ± 34.7 <sup>b</sup>   | 533.0 ± 79.7 <sup>a</sup>  |
|                      | 15-HETE                 | 3.2 ± 1.5 <sup>b</sup>    | 17.3 ± 32.2 <sup>b</sup>    | 34.9 ± 12.5 <sup>b</sup>   | 209.1 ± 16.2 <sup>a</sup>  |
|                      | 20-HETE                 | < LOD                     | < LOD                       | 31.8 ± 14.9 <sup>b</sup>   | 254.2 ± 32.8 <sup>a</sup>  |
|                      | 5-oxo-ETE               | 13.8 ± 10.1 <sup>b</sup>  | < LOD                       | 32.8 ± 26.9 <sup>b</sup>   | 836.2 ± 118.7 <sup>a</sup> |
|                      | 15-oxo-ETE              | 5.8 ± 4.4 <sup>b</sup>    | < LOD                       | 38.2 ± 21.0 <sup>b</sup>   | 386.0 ± 95.0 <sup>a</sup>  |
|                      | 5;6-EpETrE              | 0.1 ± 0.1 <sup>b</sup>    | < LOD                       | 0.4 ± 0.1 <sup>b</sup>     | 1.9 ± 0.5 <sup>a</sup>     |
|                      | 8;9-EpETrE/11;12-EpETrE | 2.0 ± 0.9 <sup>b</sup>    | < LOD                       | 14.3 ± 6.3 <sup>b</sup>    | 127.3 ± 24.1 <sup>a</sup>  |
|                      | 14;15-EpETrE            | 1.9 ± 0.9 <sup>c</sup>    | < LOD                       | 21.5 ± 7.6 <sup>b</sup>    | 133.1 ± 11.5 <sup>a</sup>  |
|                      | 5,6-DiHETrE             | < LOD                     | < LOD                       | 0.5 ± 0.3 <sup>b</sup>     | 4.0 ± 1.4 <sup>a</sup>     |
|                      | 11,12-DiHETrE           | < LOD                     | < LOD                       | < LOD                      | 1.8 ± 0.2 <sup>a</sup>     |
|                      | 14,15-DiHETrE           | < LOD                     | 2.9 ± 1.4 <sup>b</sup>      | 1.5 ± 0.6 <sup>b</sup>     | 12.2 ± 0.4 <sup>a</sup>    |
|                      | LXA <sub>4</sub>        | < LOD                     | 4.0 ± 1.4 <sup>b</sup>      | 89.1 ± 42.9 <sup>a</sup>   | 32.2 ± 0.3 <sup>ab</sup>   |
|                      | PGE <sub>2</sub>        | 1.2 ± 0.5 <sup>b</sup>    | 5.4 ± 8.0 <sup>b</sup>      | 4.4 ± 2.5 <sup>b</sup>     | 38.3 ± 24.8 <sup>a</sup>   |
|                      | LA                      | 12;13-EpOME               | 1.4 ± 1.1 <sup>c</sup>      | 19.3 ± 11.0 <sup>ab</sup>  | 10.5 ± 2.9 <sup>bc</sup>   |
| 9;10-EpOME           |                         | 0.6 ± 0.2 <sup>c</sup>    | 13.1 ± 7.5 <sup>ab</sup>    | 7.0 ± 2.0 <sup>bc</sup>    | 19.9 ± 2.1 <sup>a</sup>    |
| 9,10-DiHOME          |                         | < LOQ                     | 1.5 ± 0.7 <sup>b</sup>      | < LOD                      | 7.5 ± 0.3 <sup>a</sup>     |
| 12,13-DiHOME         |                         | < LOD                     | 1.8 ± 0.6 <sup>b</sup>      | 1.9 ± 0.8 <sup>b</sup>     | 7.0 ± 1.4 <sup>a</sup>     |
| 9-HODE               |                         | 7.1 ± 6.1 <sup>c</sup>    | 102.1 ± 58.9 <sup>ab</sup>  | 53.3 ± 13.9 <sup>bc</sup>  | 147.4 ± 12.5 <sup>a</sup>  |
| 13-HODE              |                         | 22.8 ± 18.2 <sup>c</sup>  | 313.1 ± 176.9 <sup>ab</sup> | 176.6 ± 50.5 <sup>bc</sup> | 477.9 ± 120.5 <sup>a</sup> |
| 9-oxo-ODE            |                         | 9.0 ± 4.6 <sup>c</sup>    | 68.8 ± 35.4 <sup>b</sup>    | 56.6 ± 23.2 <sup>b</sup>   | 127.5 ± 22.8 <sup>a</sup>  |
| 13-oxo-ODE           |                         | 2.3 ± 1.7 <sup>b</sup>    | 18.3 ± 10.6 <sup>a</sup>    | 7.7 ± 3.9 <sup>ab</sup>    | 17.7 ± 3.1 <sup>ab</sup>   |
| 9,10,13-TriHOME      |                         | 2.6 ± 1.6 <sup>b</sup>    | 3.6 ± 2.4 <sup>b</sup>      | 15.0 ± 4.4 <sup>a</sup>    | 1.8 ± 0.2 <sup>b</sup>     |
| 9,12,13-TriHOME      | < LOD                   | < LOQ                     | < LOD                       | < LOD                      |                            |

|    |             |                        |       |       |                            |
|----|-------------|------------------------|-------|-------|----------------------------|
|    | Total HpOME | 4.8 ± 4.1 <sup>b</sup> | < LOD | < LOD | 578.5 ± 231.9 <sup>a</sup> |
| LA | 13-HpODE    | 0.4 ± 0.5 <sup>b</sup> | < LOD | < LOD | 16.8 ± 6.9 <sup>a</sup>    |
|    | 9-HpOME     | < LOD                  | < LOD | < LOD | 1.1 ± 0.5 <sup>a</sup>     |

Data is shown as mean ± SD (n ≥ 3). Different lower-case letters (a, b, c) show statistically significant differences (p < 0.05). ARA: Arachidonic acid; LA: Linoleic acid; HETE: Hydroxyeicosatetraenoic acid; Oxo-EETE: oxoeicosatetraenoic acid; EpETrE: Epoxyeicosatrienoic acid; DiHETrE: Dihydroxyeicosatrienoic acid; LX: Lipoxin; PG: Prostaglandin; EpOME: Epoxyoctadecenoic acid; HOME: Hydroxyoctadecenoic acid; HODE: Hydroxyoctadecadienoic acid; Oxo-ODE: Oxooctadecadienoic acid; HpOME: Hydroperoxyoctadecenoic acid; HpODE: Hydroperoxyoctadecadienoic acid; LOD: Limit of detection; LOQ: Limit of quantification.

## References

- (1) Andreou, A.; Brodhun, F.; Feussner, I. Biosynthesis of oxylipins in non-mammals. *Prog Lipid Res* **2009**, *48* (3-4), 148-170. DOI: 10.1016/j.plipres.2009.02.002.
- (2) Gabbs, M.; Leng, S.; Devassy, J. G.; Monirujjaman, M.; Aukema, H. M. Advances in our understanding of oxylipins derived from dietary PUFAs. *Advances in Nutrition* **2015**, *6* (5), 513-540. DOI: 10.3945/an.114.007732.
- (3) Jagusch, H.; Baumeister, T. U. H.; Pohnert, G. Mammalian-like inflammatory and pro-resolving oxylipins in marine algae. *ChemBioChem* **2020**, *21* (17), 2419-2424. DOI: 10.1002/cbic.202000178.
- (4) Emami, S.; Zhang, Z.; Taha, A. Y. Quantitation of oxylipins in fish and algae oil supplements using optimized hydrolysis procedures and ultra-high performance liquid chromatography coupled to tandem mass-spectrometry. *Journal of Agricultural and Food Chemistry* **2020**, *68* (35), 9329-9344. DOI: 10.1021/acs.jafc.0c02461.
- (5) Ostermann, A. I.; Willenberg, I.; Schebb, N. H. Comparison of sample preparation methods for the quantitative analysis of eicosanoids and other oxylipins in plasma by means of LC-MS/MS. *Anal Bioanal Chem* **2015**, *407* (5), 1403-1414. DOI: 10.1007/s00216-014-8377-4.
